# Supplementary material for: Simultaneous measurement of lithium isotope and lithium/beryllium ratios in FLiBe salts using MC-ICP-MS
Source: Royal Society of Chemistry journal article supplement (doi:10.1039/d2ja00097k), 2022-01-01
Supplement: d2ja00097k1.xlsx [file d2ja00097k1.xlsx]

## Sheet: Sheet1
Supplementary File
Simultaneous measurement of lithium isotope and lithium/beryllium ratios in FLiBe salts using MC-ICP-MS
Sean R. Scott1, Francesco Carotti2, Alan Kruizenga2, Raluca O. Scarlat3, Sara Mastromarino3, Martin M. Shafer1
1Wisconsin State Laboratory of Hygiene, University of Wisconsin-Madison, 2601 Agriculture Drive, Madison, WI 53707-7996, USA. srscott4@wisc.edu; mmshafer@wisc.edu
2Kairos Power LLC, 707 W. Tower Avenue, Alameda, CA 94501, USA
3University of California Berkeley, 4169 Etcheverry Hall, Berkeley, CA 94720
Gravimetric Standard Calculations
Gravimetric NIST924a-NIST1877 standard
Atomic weights
Nuclide	g/mol	Note
6Li	6.01512	http://atom.kaeri.re.kr/nuchart/
7Li	7.016	http://atom.kaeri.re.kr/nuchart/
9Be	9.01218	http://atom.kaeri.re.kr/nuchart/
Element/molecule	g/mol	Note
Li	6.93992	Determined using 7Li abundance (92.3982 %) measured relative to LSVEC
C	12.0107	Average carbon
O	15.9994	Average oxygen
Li2CO3	73.8887
BeO	25.0116
NIST924a (certificate information)
Lithium Carbonate	g/g	±	% error
Mass fraction	0.99867	0.00017	0.000170226
Li mass fraction	0.187598	3.19341e-05
Li mole/gram	0.0270317	4.60151e-06
NIST1877 (certificate information)
Beryllium oxide	g/g	±	% error
Be mass fraction	0.3576	0.0024	0.00671141
Be mole/gram	0.0396796	0.000266306
Final Mixture
Material	Wt. (grams)	Wt. Element	moles Element
NIST924a (Li)	0.10233	0.0191969	0.00276616
NIST1877 (Be)	0.06908	0.024703	0.00274107
Li/Be			1.00915
7Li/9Be			0.932439
Gravimetric LSVEC-NIST1877 standard
Atomic weights
Nuclide	g/mol	Note
6Li	6.01512	http://atom.kaeri.re.kr/nuchart/
7Li	7.016	http://atom.kaeri.re.kr/nuchart/
9Be	9.01218	http://atom.kaeri.re.kr/nuchart/
Element/molecule	g/mol	Note
Li	6.94002	Determined assuming 6Li/7Li ratio = 0.08215 (Qi et al., 1997)
C	12.0107	Average carbon
O	15.9994	Average oxygen
Li2CO3	73.8889
BeO	25.0116
LSVEC (isotopic standard)
Lithium Carbonate	g/g	Note
Mass fraction	1	The LSVEC isotopic standard is not certified for Li mass fraction
Li Mass Fraction	0.18785
Li mole/gram	0.0270676
NIST1877 (certificate information)
Beryllium oxide	g/g	±	% error
Be mass fraction	0.3576	0.0024	0.00671141
Be mole/gram	0.0396796	0.000266306
Final Mixture
Material	Wt. (grams)	Wt. Element	moles Element
LSVEC (Li)	0.10487	0.0196998	0.00283858
NIST1877 (Be)	0.0695	0.0248532	0.00275773
Li/Be			1.02932
7Li/9Be			0.951071
